# Supplementary material for: Inference of Population Splits and Mixtures from Genome-Wide Allele Frequency Data
Source: PubMed Central journal article supplement (PMC3499260; doi:10.1371/journal.pgen.1002967), 2012-11-15

A. Example tree 1

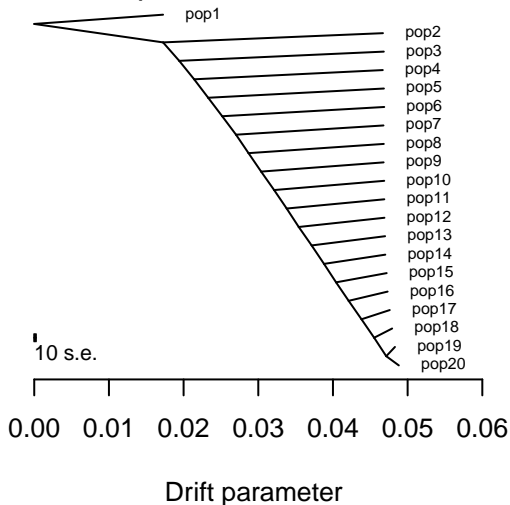

B. Residual fit from tree in A.

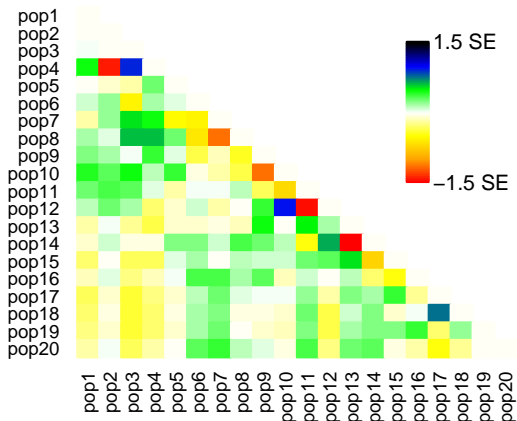

C. Example tree 2

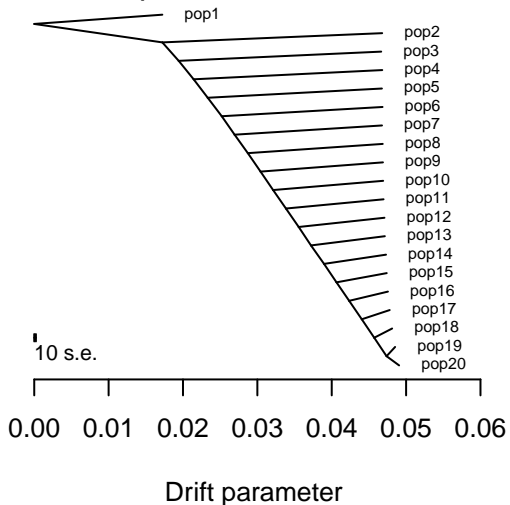

D. Residual fit from tree in C.

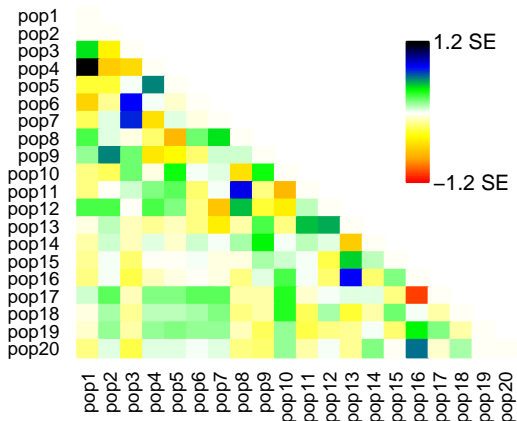

Supplement: pgen.1002967.s006.pdf [file pgen.1002967.s006.pdf]
