# Supplementary material for: Inference of Population Splits and Mixtures from Genome-Wide Allele Frequency Data
Source: PubMed Central journal article supplement (PMC3499260; doi:10.1371/journal.pgen.1002967), 2012-11-15

A. correct graph topology

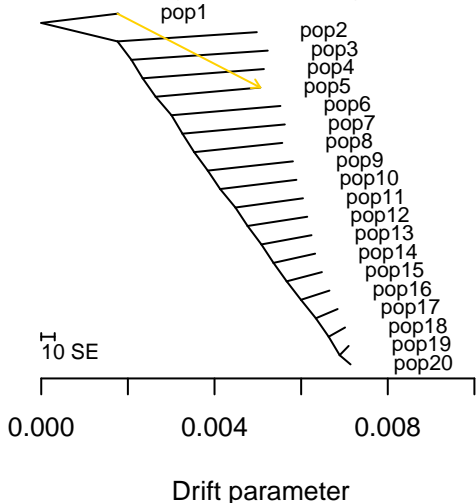

B. common error (w = 10%)

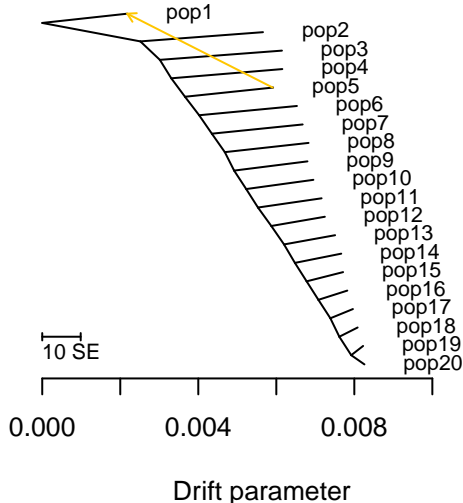

C. common error (w = 30%)

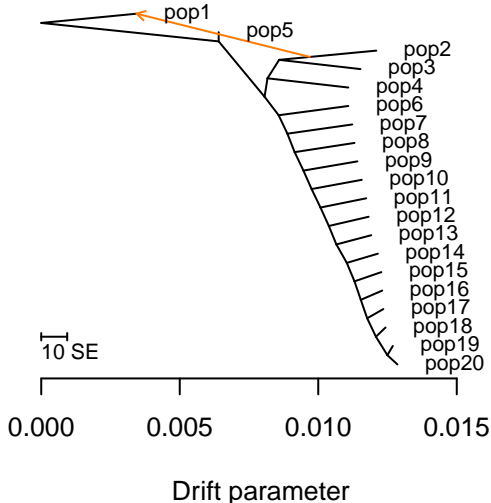

Supplement: pgen.1002967.s007.pdf [file pgen.1002967.s007.pdf]
