# Supplementary material for: Inference of Population Splits and Mixtures from Genome-Wide Allele Frequency Data
Source: PubMed Central journal article supplement (PMC3499260; doi:10.1371/journal.pgen.1002967), 2012-11-15

## A. Yoruba ascertainment

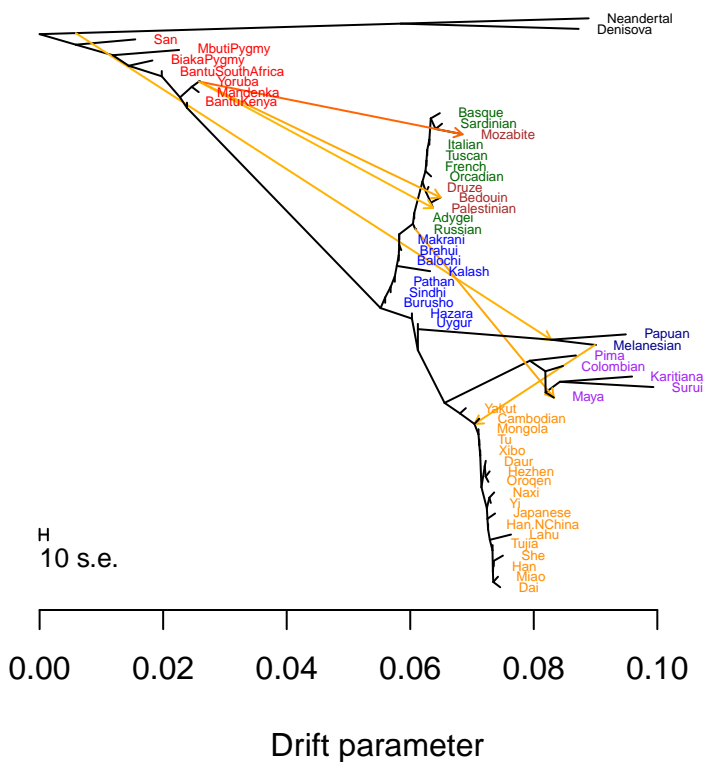

## B. French ascertainment

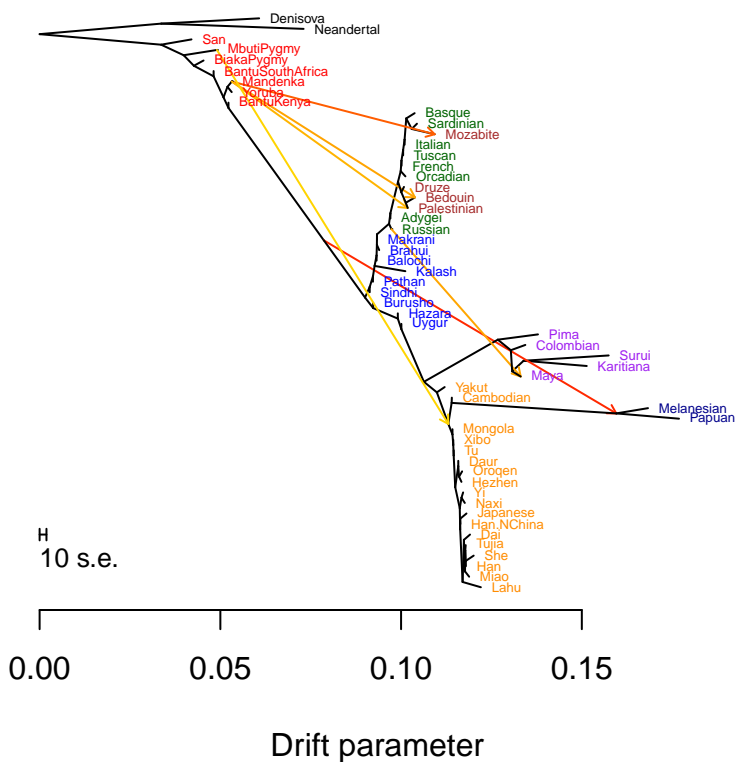

Supplement: pgen.1002967.s012.pdf [file pgen.1002967.s012.pdf]
