# Supplementary material for: Inference of Population Splits and Mixtures from Genome-Wide Allele Frequency Data
Source: PLOS journal article supplement (doi:10.1371/journal.pgen.1002967), 2012-11-15

A. Africa tree

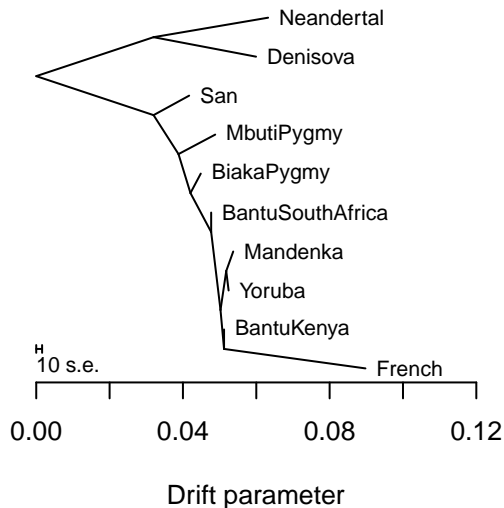

B. Africa tree residuals

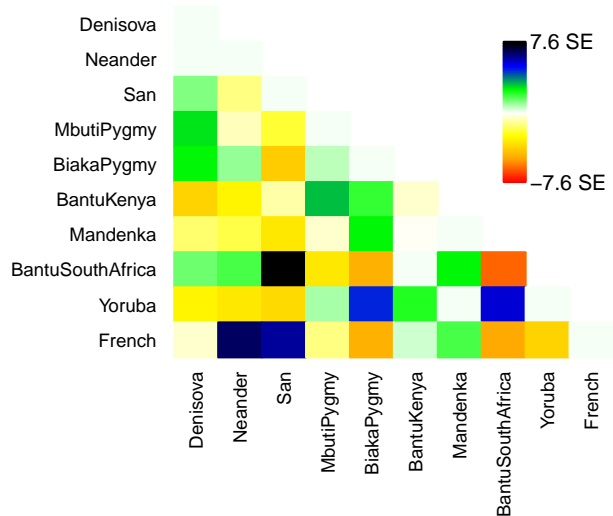

C. Africa graph

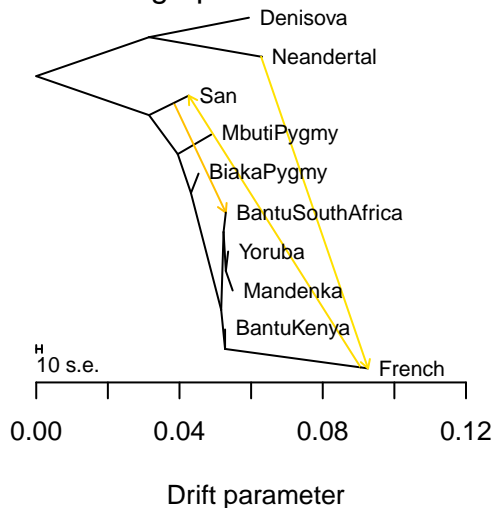

D. Africa graph residuals

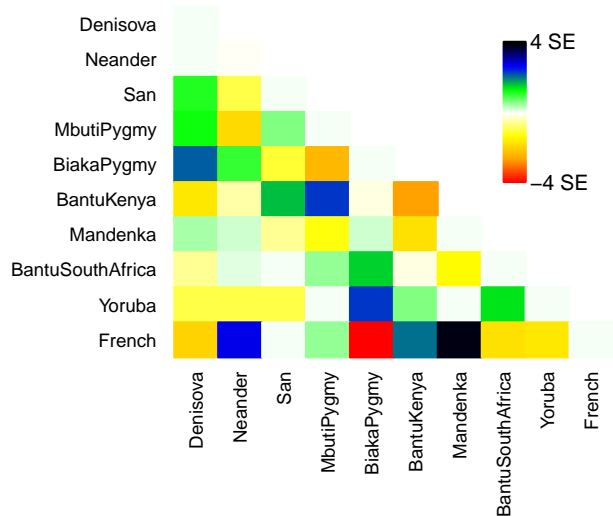

Supplement: S15 (10.1371/journal.pgen.1002967.s015) [file journal.pgen.1002967.s015.pdf › journal.pgen.1002967.s015.pdf]
